# Supplementary material
Source: HighWire-hosted journal article supplement (https://jitc.bmj.com/content/9/8/e002757)
Supplement: inline-supplementary-material-6 [file inline-supplementary-material-6.pdf]

# Integrated analysis of a phase 2 study of cemiplimab in advanced cutaneous squamous cell carcinoma: extended follow-up of outcomes and quality of life analysis

**Objective:** To provide pooled longer-term data from three groups of a phase 2 study of cemiplimab 3 mg/kg intravenously (IV) every 2 weeks (Q2W) or 350 mg IV every 3 weeks (Q3W) in patients with locally advanced (la) or metastatic (m) cutaneous squamous cell carcinoma (CSCC), and to determine duration of response (DOR) and impact on quality of life (QoL).

## Cemiplimab

3 mg/kg Q2W IV  
for up to 96 weeks  
(Group 1; Group 2)

mCSCC    laCSCC

n=59

n=78

## Cemiplimab

350 mg Q3W IV  
for up to 54 weeks  
(Group 3)

mCSCC

n=56

Clinicaltrials.gov: NCT02760498

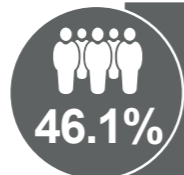

**Objective response rate**  
per independent central review

Median duration of follow-up: 15.7 months

## Complete response rates per independent central review

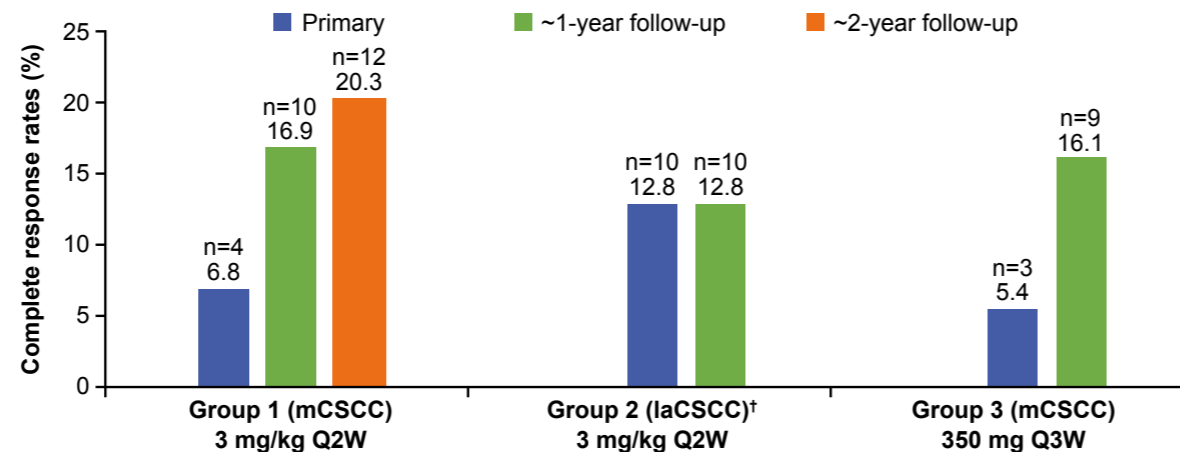

†At the time of the Group 1 primary analysis, a pre-specified Group 2 interim analysis was performed. Among the 23 laCSCC patients included in this pre-specified interim analysis, there were no complete responses.

Median DOR not reached; estimated percentage of patients who remained in response at 12 months was **87.8%**

87.8%

## Kaplan–Meier curves for DOR per independent central review

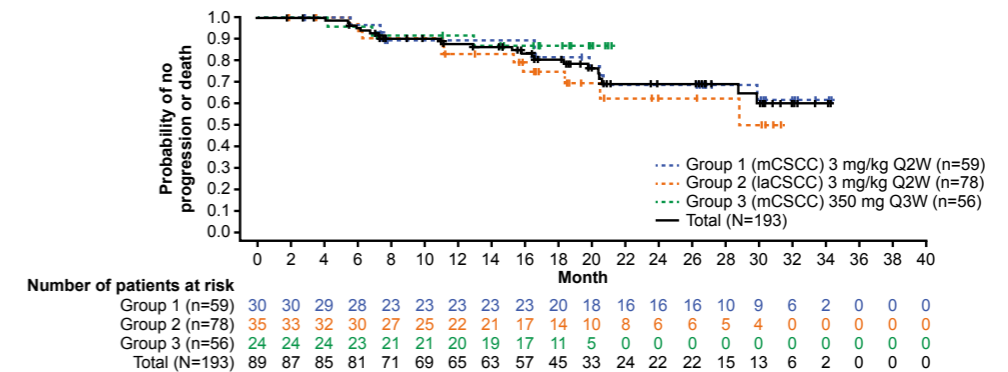

## Change from baseline in Global Health Status/health-related QoL (GHS/HRQoL) and pain scores

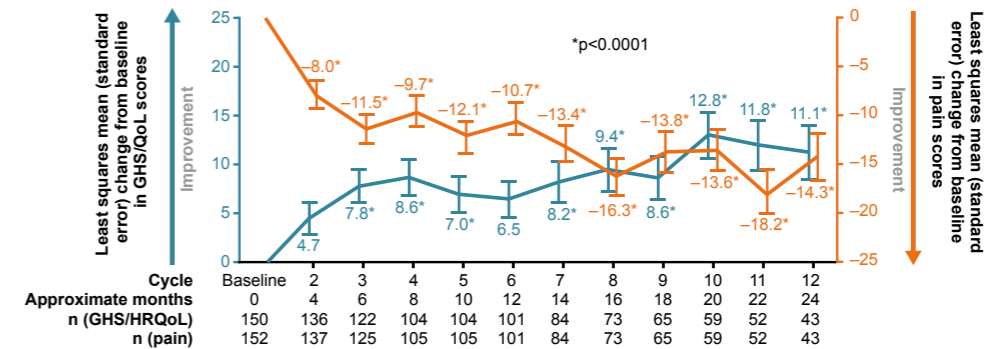

**Summary:** In patients with advanced CSCC, cemiplimab 3 mg/kg Q2W or 350 mg IV Q3W was associated with sustained substantial clinical activity, including improved complete response rates over time, durable pain control, and QoL improvement.

**Authors:** Danny Rischin\*, Nikhil I. Khushalani, Chrysalyn D. Schmults, Alexander Guminski, Anne Lynn S. Chang, Karl D Lewis, Annette. M. Lim, Leonel Hernandez-Aya, Brett G. M. Hughes, Dirk Schadendorf, Axel Hauschild, Alesha A. Thai, Elizabeth Stankevich, Jocelyn Booth, Suk-Young Yoo, Siyu Li, Zhen Chen, Emmanuel Okoye, ChiEh-I Chen, Vera Mastey, Medha Sasane, Israel Lowy, Matthew G. Fury, Michael R. Migden. \*Correspondence: Danny.Rischin@petermac.org
